# Supplementary material for: Impact of physician’s sex/gender on processes of care, and clinical outcomes in cardiac operative care: a systematic review
Source: PubMed Central journal article supplement — BMJ Open. 2020 Sep 29;10(9):e037139. doi: 10.1136/bmjopen-2020-037139 (PMC7526284; doi:10.1136/bmjopen-2020-037139), 2020-09-29
Supplement: bmjopen-2020-037139supp001.pdf [file bmjopen-2020-037139supp001.pdf]

## Appendix 1: Search strategy

**Database: Ovid MEDLINE(R) and Epub Ahead of Print, In-Process & Other Non-Indexed Citations and Daily <1946 to September 06, 2018>**

### Search Strategy:

- 
- 1 exp cardiac surgical procedures/ (200938)
  - 2 exp Heart Diseases/su [Surgery] (156583)
  - 3 Heart Neoplasms/su [Surgery] (4760)
  - 4 ((cardiac or heart or coronary or cardiovascular) adj2 surg\*).tw. (67075)
  - 5 (cardiac surg\* or heart surg\*).kw. (7445)
  - 6 ((cardiothoracic or cardio thoracic) adj2 (surg\* or resection)).tw. (3248)
  - 7 (cardiothoracic surg\* or cardi-thoracic surg\*).kw. (151)
  - 8 ((cardiac or heart) adj2 transplant\*).tw. (31061)
  - 9 exp Heart Valves/su [Surgery] (28200)
  - 10 exp Heart Defects, Congenital/su [Surgery] (45282)
  - 11 (valv\* adj2 (repair or replacement or implant\* or annuloplasty)).tw. (39378)
  - 12 (coronary artery bypass graft\* or coronary artery bypass surgery or CABG).tw,kw. (38366)
  - 13 (aortocoronary adj2 (bypass or graft\*)).tw. (2745)
  - 14 pericardectom\*.tw,kw. (300)
  - 15 cardiomyoplast\*.tw,kw. (842)
  - 16 myectom\*.tw,kw. (1504)
  - 17 or/1-16 (343953)
  - 18 ((sex or gender) adj2 (difference\* or disparit\*)).tw. (70531)
  - 19 (gender difference\* or gender based or gender specific).tw,kw. (39305)
  - 20 (sex or gender or women or men or female or male).ti. (548983)
  - 21 Physicians, Women/ (5625)
  - 22 ((female or women or male) adj3 (surgeon\* or physician\* or an?esthesiologist\* or an?esthetist\*)).tw. (5058)
  - 23 female gender.tw. (14006)
  - 24 male gender.tw. (13788)
  - 25 or/18-24 (616019)
  - 26 perioperative care/ or perioperative period/ or intraoperative period/ or postoperative period/ or preoperative period/ (75044)
  - 27 (preoperative\* or pre-operative\* or perioperative\* or peri-operative\* or intraoperative\* or intra-operative\* or postoperative\* or post-operative\*).tw,kw. (773968)
  - 28 (postoperative\* or post-operative\* or postsurg\* or post-surg\*).tw,kw. (552307)
  - 29 Postoperative Complications/ (336691)
  - 30 or/26-29 (1009987)
  - 31 17 and 25 and 30 (1185)
  - 32 ((post or following or after) adj3 (cardiac surg\* or heart surg\* or coronary surg\* or cardiovascular surg\* or cardiothoracic surg\* or cardio-thoracic surg\* or cardiac transplant\* or heart transplant\* or CABG or myectom\* or cardiomyoplast\* or pericardectom\* or coronary artery bypass surg\* or coronary artery bypass graft\*)).tw. (33888)
  - 33 25 and 32 (643)
  - 34 31 or 33 (1432)
  - 35 animals/ not humans/ (4462509)
  - 36 34 not 35 (1429)
  - 37 case reports.pt. (1895280)
  - 38 **36 not 37 (1367)**

**Database: Embase Classic+Embase <1947 to 2018 September 6>  
Search Strategy:**

- 
- 1 exp \*heart surgery/ (185030)
  - 2 ((cardiac or heart or coronary or cardiovascular) adj2 surg\*).tw. (95608)
  - 3 ((cardiothoracic or cardio thoracic) adj2 (surg\* or resection)).tw. (10404)
  - 4 ((cardiac or heart) adj2 transplant\*).tw. (48320)
  - 5 (valv\* adj2 (repair or replacement or implant\* or annuloplasty)).tw. (59368)
  - 6 (coronary artery bypass graft\* or coronary artery bypass surgery or CABG).tw. (55469)
  - 7 (aortocoronary adj2 (bypass or graft\*)).tw. (3137)
  - 8 pericardectom\*.tw. (485)
  - 9 cardiomyoplast\*.tw. (993)
  - 10 myectom\*.tw. (2067)
  - 11 or/1-10 (306709)
  - 12 \*sex difference/ (36769)
  - 13 ((sex or gender) adj2 (difference\* or disparit\*)).tw. (93875)
  - 14 (gender difference\* or gender based or gender specific).tw. (51324)
  - 15 (sex or gender or women or men or female or male).ti. (686782)
  - 16 female physician/ (4639)
  - 17 ((female or women or male) adj3 (surgeon\* or physician\* or an?esthesiologist\* or an?esthetist\*)).tw. (6274)
  - 18 (female gender or male gender).tw. (45514)
  - 19 or/12-18 (789727)
  - 20 perioperative period/ (41769)
  - 21 preoperative period/ or preoperative care/ (85168)
  - 22 intraoperative period/ (35068)
  - 23 postoperative period/ (189526)
  - 24 (preoperative\* or pre-operative\* or perioperative\* or peri-operative\* or intraoperative\* or intra-operative\* or postoperative\* or post-operative\*).tw. (1088663)
  - 25 (postoperative\* or post-operative\* or postsurg\* or post-surg\*).tw. (783471)
  - 26 \*postoperative complication/ (64743)
  - 27 or/20-26 (1247931)
  - 28 11 and 19 and 27 (1414)
  - 29 ((post or following or after) adj3 (cardiac surg\* or heart surg\* or coronary surg\* or cardiovascular surg\* or cardiothoracic surg\* or cardio-thoracic surg\* or cardiac transplant\* or heart transplant\* or CABG or myectom\* or cardiomyoplast\* or pericardectom\* or coronary artery bypass surg\* or coronary artery bypass graft\*)).tw. (49291)
  - 30 19 and 29 (1026)
  - 31 28 or 30 (1899)
  - 32 case report/ (2364953)
  - 33 31 not 32 (1835)
  - 34 animals/ not humans/ (1320229)
  - 35 **33 not 34 (1833)**

**Database: PsycINFO <1806 to September Week 1 2018>****Search Strategy:**

- 
- 1 Heart Surgery/ (1440)
  - 2 ((cardiac or heart or coronary or cardiovascular) adj2 surg\*).tw. (1427)
  - 3 ((cardiothoracic or cardio thoracic) adj2 (surg\* or resection)).tw. (51)
  - 4 ((cardiac or heart) adj2 transplant\*).tw. (450)
  - 5 (valv\* adj2 (repair or replacement or implant\* or annuloplasty)).tw. (118)
  - 6 (coronary artery bypass graft\* or coronary artery bypass surgery or CABG).tw,kw. (837)
  - 7 (aortocoronary adj2 (bypass or graft\*)).tw. (9)
  - 8 pericardectom\*.tw,kw. (0)
  - 9 cardiomyoplast\*.tw,kw. (0)
  - 10 myectom\*.tw,kw. (1)
  - 11 or/1-10 (2726)
  - 12 Human Sex Differences/ (107002)
  - 13 ((sex or gender) adj2 (difference\* or disparit\*)).tw. (77653)
  - 14 (gender difference\* or gender based or gender specific).tw,kw. (48241)
  - 15 HUMAN FEMALES/ (87482)
  - 16 (sex or gender or women or men or female or male).ti. (219801)
  - 17 ((female or women or male) adj3 (surgeon\* or physician\* or an?esthesiologist\* or an?esthetist\*)).tw. (1337)
  - 18 female gender.tw. (3363)
  - 19 male gender.tw. (2936)
  - 20 or/12-19 (328932)
  - 21 11 and 20 (174)
  - 22 Surgical Patients/ or Surgery/ (14030)
  - 23 (preoperative\* or pre-operative\* or perioperative\* or peri-operative\* or intraoperative\* or intra-operative\* or postoperative\* or post-operative\*).tw,kw. (12886)
  - 24 (postoperative\* or post-operative\* or postsurg\* or post-surg\*).tw,kw. (11666)
  - 25 Postsurgical Complications/ (825)
  - 26 or/22-25 (23936)
  - 27 21 and 26 (74)
  - 28 ((post or following or after) adj3 (cardiac surg\* or heart surg\* or coronary surg\* or cardiovascular surg\* or cardiothoracic surg\* or cardio-thoracic surg\* or cardiac transplant\* or heart transplant\* or CABG or myectom\* or cardiomyoplast\* or pericardectom\* or coronary artery bypass surg\* or coronary artery bypass graft\*)).tw. (870)
  - 29 21 and 28 (59)
  - 30 27 or 29 (96)
