# Supplementary material for: Impact of physician’s sex/gender on processes of care, and clinical outcomes in cardiac operative care: a systematic review
Source: PubMed Central journal article supplement — BMJ Open. 2020 Sep 29;10(9):e037139. doi: 10.1136/bmjopen-2020-037139 (PMC7526284; doi:10.1136/bmjopen-2020-037139), 2020-09-29
Supplement: bmjopen-2020-037139supp002.pdf [file bmjopen-2020-037139supp002.pdf]

**Appendix 2: Reason for exclusion for references screened at Level 2**

| First author, year       | Reference                                                                                                                                                                                                                                                                     | Reason for exclusion                         |
|--------------------------|-------------------------------------------------------------------------------------------------------------------------------------------------------------------------------------------------------------------------------------------------------------------------------|----------------------------------------------|
| Kobayashi H. et al, 1988 | Coronary artery bypass grafting in women: analyses of preoperative and intraoperative factors. <i>Nihon Kyobu Geka Gakkai Zasshi</i> . 1988 Aug;36(8):1285-91                                                                                                                 | Japanese, non-English                        |
| Hanet C. et al., 1990    | Angiographic evaluation of vasomotor properties of internal mammary arteries before and after coronary artery bypass grafting in men. <i>The American Journal of Cardiology</i> . 1990;65(13):918–21.                                                                         | Studied patient sex only                     |
| Meyer SA., 1993          | The relationship of nutritional status, personality hardiness, and social support of the older adult to treatment outcomes following non-emergent cardiac surgery. <i>Thesis (D.P.H.) University of Hawaii at Manoa</i>                                                       | Doctorate thesis                             |
| Vallejo JL. et al, 1994  | Influence of sex in the technique and results of valvular surgery. <i>Rev Esp Cardiol</i> . 1994;47 Suppl 3:68–75.                                                                                                                                                            | Spanish, non-English                         |
| Bryan CF. et al., 1996   | Influence of donor gender on patient mortality after heart transplantation. <i>Transplant Protocol</i> . 1996 Feb;28(1):149-51.                                                                                                                                               | Studied recipient and donor patient sex only |
| Aidala E. et al., 1999   | Gender and coronary artery bypass mortality. <i>Ann Thorac Surg</i> . 1999 Aug;68(2):625–6.                                                                                                                                                                                   | Commentary                                   |
| TH. Lee., 2001           | Heart lines. Neurological complications more common in women after heart surgery. <i>Harvard Heart Letter</i> . 2001 Dec;12(4):1-7                                                                                                                                            | Commentary                                   |
| Herd JA. et al., 2003    | Heart rate and blood pressure responses to mental stress and clinical cardiovascular events in men and women after coronary artery bypass grafting: The Post Coronary Artery Bypass Graft (Post-CABG) biobehavioral study. <i>American Heart Journal</i> . 2003;146(2):273–9. | Studied patient sex only                     |

|                           |                                                                                                                                                                                    |                             |
|---------------------------|------------------------------------------------------------------------------------------------------------------------------------------------------------------------------------|-----------------------------|
| Koch CG. et al., 2003     | Is it gender, methodology, or something else? <i>Journal of Thoracic and Cardiovascular Surgery</i> . 2003;126(4):932–5.                                                           | Commentary                  |
| Habib RH. et al., 2004    | Sex differences in mortality after coronary artery bypass graft surgery. <i>JAMA</i> . 2004 Jul 7;292(1):40–1.                                                                     | Commentary                  |
| Habib RH. et al., 2004    | Worse early outcomes in women after coronary artery bypass grafting: Is it simply a matter of size? <i>The Journal of Thoracic and Cardiovascular Surgery</i> . 2004;128(3):487–8. | Commentary                  |
| Cheng TO., 2005           | In China women uphold half of the sky. <i>International Journal of Cardiology</i> . 2005;102(1):159–159.                                                                           | Commentary                  |
| Jonker G. et al., 2006    | Increased mortality among women after coronary artery bypass grafting seems mainly to be explained by infections. 2006.                                                            | Commentary                  |
| Dixon B. et al., 2014     | The operating surgeon is an independent predictor of chest tube drainage following cardiac surgery. <i>J Cardiothorac Vasc Anesth</i> . 2014;28(2):242–6.                          | Studied patient gender only |
| Lopes CT. et al., 2015    | Excessive bleeding predictors after cardiac surgery in adults: integrative review. <i>J Clin Nurs</i> . 2015;24(21–22):3046–62.                                                    | Studied patient sex only    |
| Mattioli AV. et al., 2018 | Combined Rehabilitation and Nutritional Coaching After Cardiac Surgery: Sex Differences. <i>The Annals of Thoracic Surgery</i> . 2018;106(4):1265.                                 | Commentary                  |

Commentary: qualitative analysis exclusively.
